# Supplementary material
Source: PubMed Central journal article supplement (PMC7483975)

# CHARACTERIZATION DATA FOR

## **Rational design of bioavailable photosensitizers for manipulation and imaging of biological systems**

Thomas C Binns<sup>1,2,3</sup>, Anthony X Ayala<sup>1</sup>, Jonathan B Grimm<sup>1</sup>, Ariana N Tkachuk<sup>1</sup>, Guillaume A Castillon<sup>4</sup>, Sebastien Phan<sup>4</sup>, Lixia Zhang<sup>1</sup>, Timothy A Brown<sup>1</sup>, Zhe Liu<sup>1</sup>, Stephen R Adams<sup>5</sup>, Mark H Ellisman<sup>4</sup>, Minoru Koyama<sup>1</sup>, and Luke D Lavis<sup>1,6,\*</sup>

<sup>1</sup>Janelia Research Campus; Howard Hughes Medical Institute; Ashburn, VA, 20147; USA

<sup>2</sup>Graduate School; University of Arkansas for Medical Sciences; Little Rock, AR, 72205; USA

<sup>3</sup>College of Medicine; University of Arkansas for Medical Sciences; Little Rock, AR, 72205; USA

<sup>4</sup>Department of Neurosciences; University of California San Diego; La Jolla, CA, 92093; USA

<sup>5</sup>Department of Pharmacology; University of California San Diego; La Jolla, CA, 92093; USA

<sup>6</sup>Lead Contact

\*Corresponding author email: [lavisl@janelia.hhmi.org](mailto:lavisl@janelia.hhmi.org)

Origin Bruker BioSpin GmbH  
 Solvent CDCl3  
 Temperature 300.0  
 Pulse Sequence zg30  
 Experiment 1D  
 Number of Scans 16  
 Acquisition Date 2019-01-15T11:37:00  
 Spectrometer Frequency 400.13  
 Spectral Width 8012.8  
 Lowest Frequency -1545.4  
 Nucleus 1H  
 Acquired Size 32768  
 Spectral Size 65536

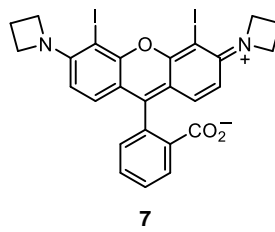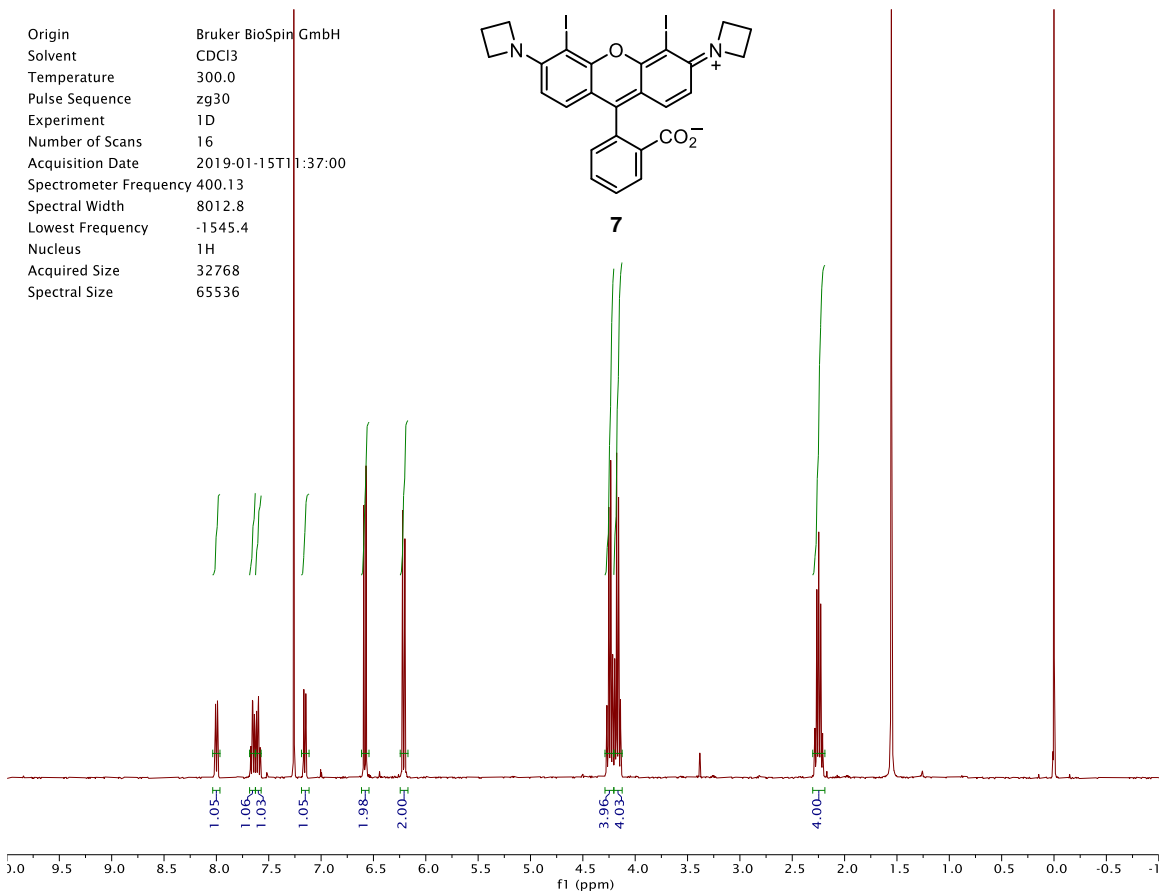

Origin Bruker BioSpin GmbH  
 Solvent CDCl3  
 Temperature 300.0  
 Pulse Sequence zgpg30  
 Experiment 1D  
 Number of Scans 4096  
 Acquisition Date 2019-01-16T00:00:36  
 Spectrometer Frequency 100.62  
 Spectral Width 24038.5  
 Lowest Frequency -1946.5  
 Nucleus 13C  
 Acquired Size 32768  
 Spectral Size 65536

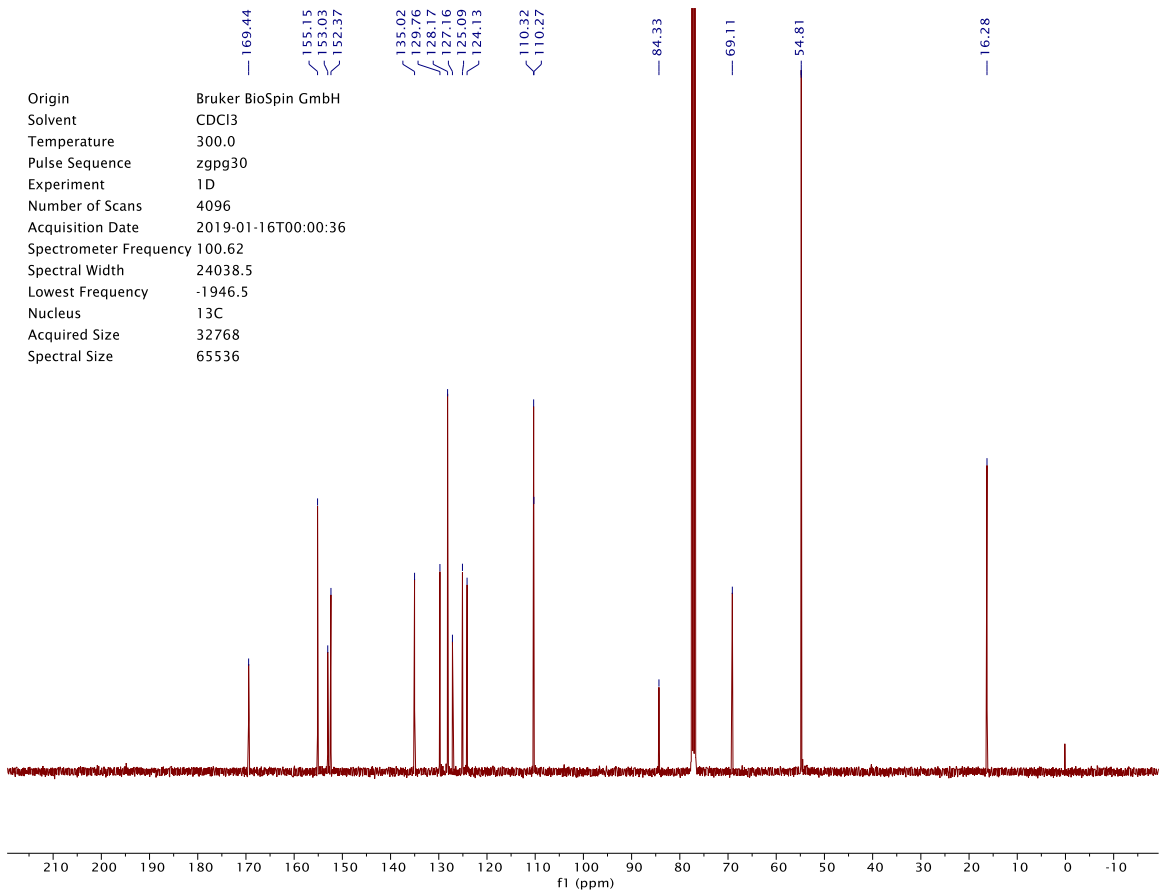

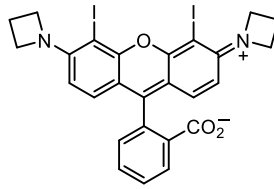

7

DAD1 C, Sig=575.4 Ref=off (2019\_01\DAIY\_SEQUENCE\_LC 2019-01-11 14-51-07\2019\_010000002.D)

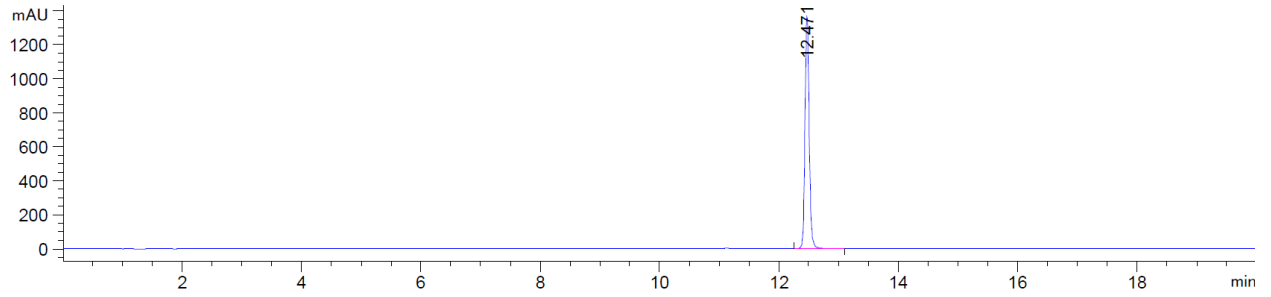

\*MSD2 SPC, time=12.479:12.552 of C:\CHEM321\DATA\2019\_01\DAIY\_SEQUENCE\_LC 2019-01-11 14-51-07\2019\_010000002.D ES-

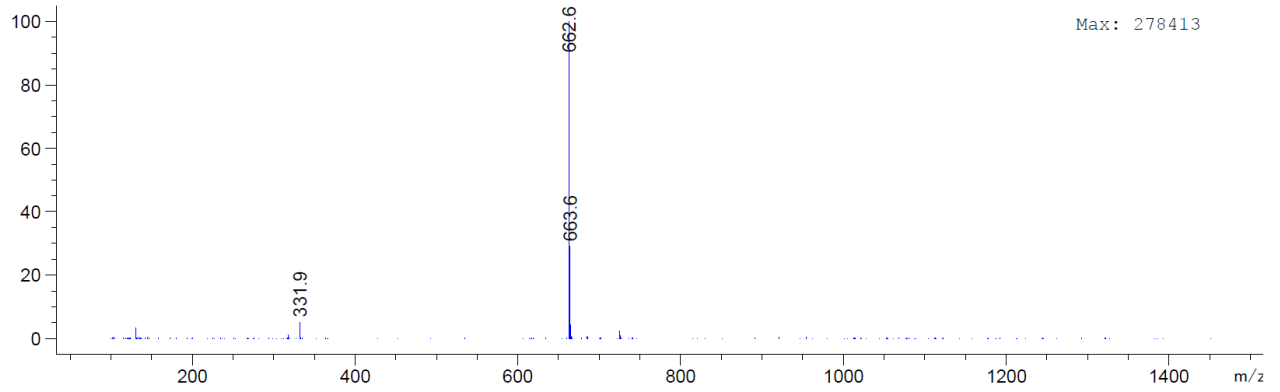

Origin: Bruker BioSpin GmbH  
 Solvent: CDCl3  
 Temperature: 300.0  
 Pulse Sequence: zg30  
 Experiment: 1D  
 Number of Scans: 16  
 Acquisition Date: 2019-01-15T11:28:00  
 Spectrometer Frequency: 400.13  
 Spectral Width: 8012.8  
 Lowest Frequency: -1545.2  
 Nucleus: 1H  
 Acquired Size: 32768  
 Spectral Size: 65536

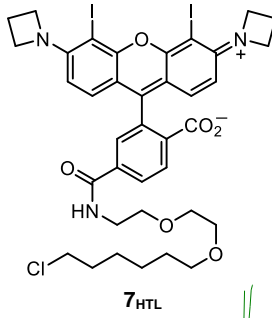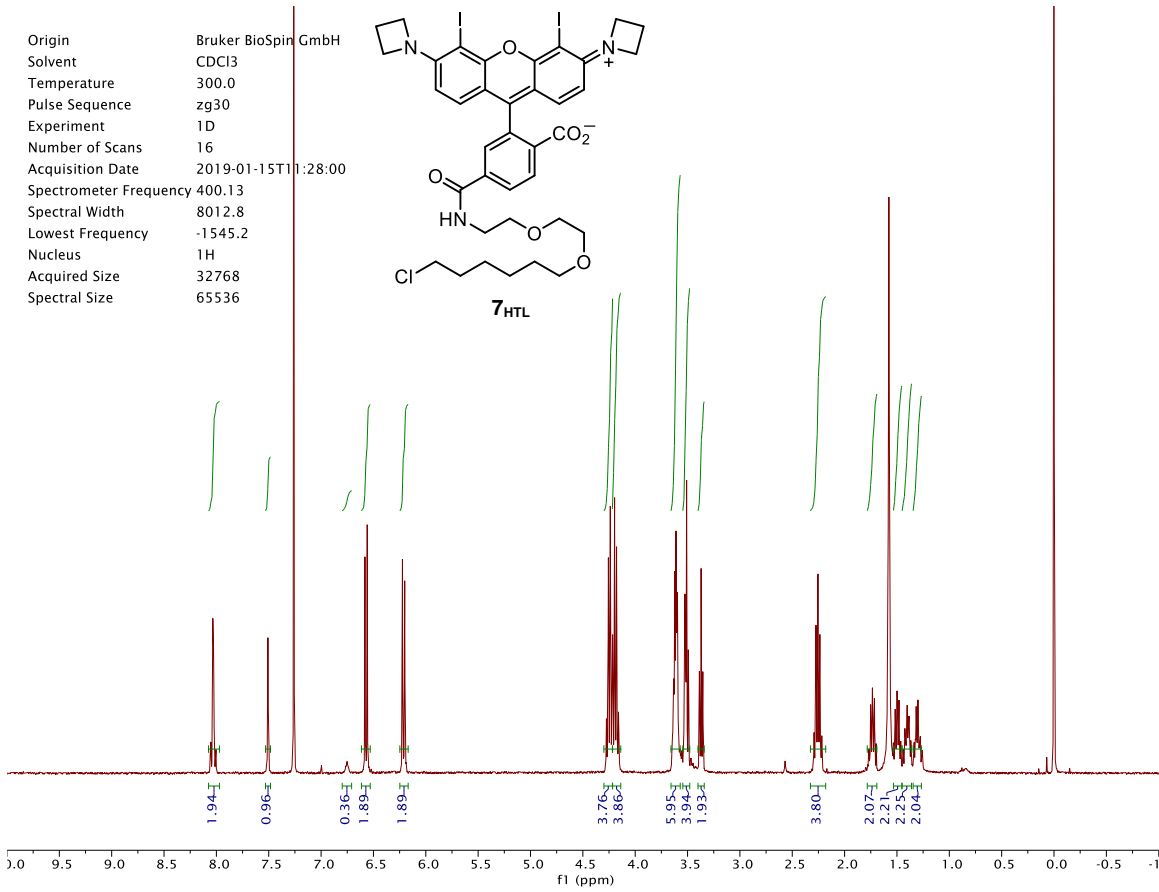

DAD1 C, Sig=575.4 Ref=off (2019\_01\DAIY\_SEQUENCE\_LC 2019-01-11 11-10-29\2019\_010000002.D)

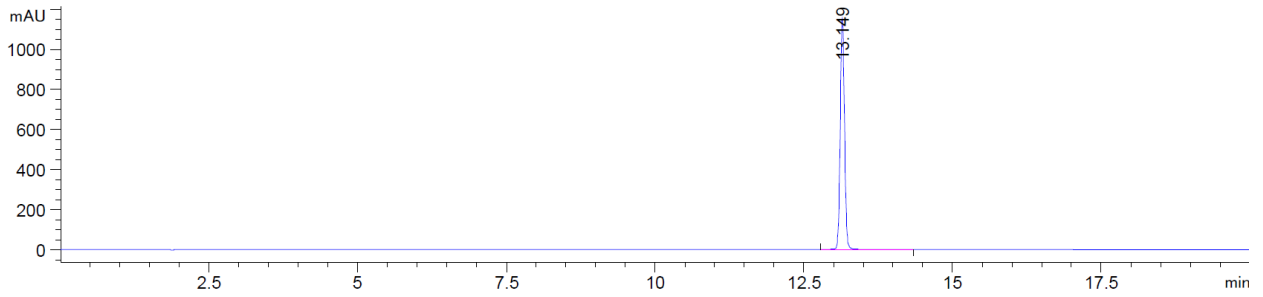

\*MSD2 SPC, time=13.151:13.242 of C:\CHEM321\DATA\2019\_01\DAIY\_SEQUENCE\_LC 2019-01-11 11-10-29\2019\_010000002.D ES-

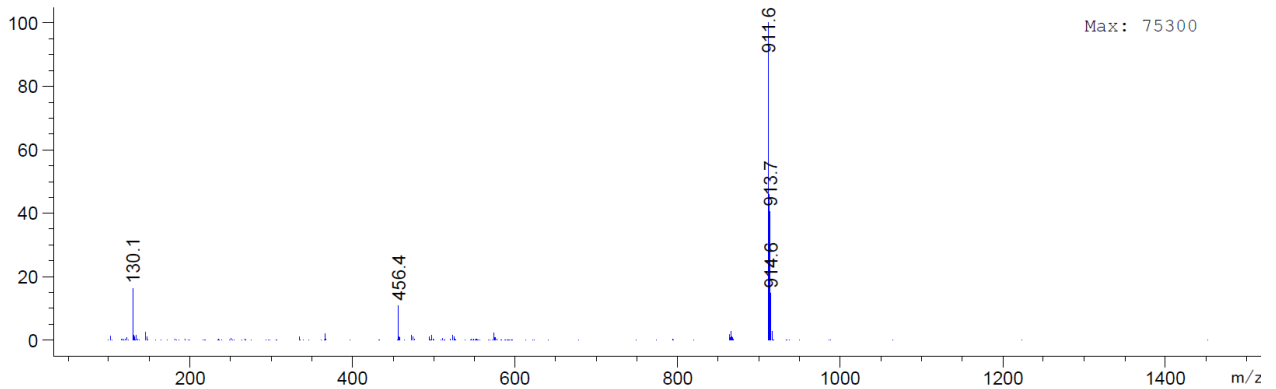

Origin Bruker BioSpin GmbH  
Solvent CDCl3  
Temperature 300.0  
Pulse Sequence zg30  
Experiment 1D  
Number of Scans 16  
Acquisition Date 2018-03-19T19:06:00  
Spectrometer Frequency 400.13  
Spectral Width 8012.8  
Lowest Frequency -1547.3  
Nucleus 1H  
Acquired Size 32768  
Spectral Size 65536

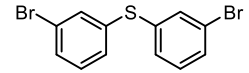

16

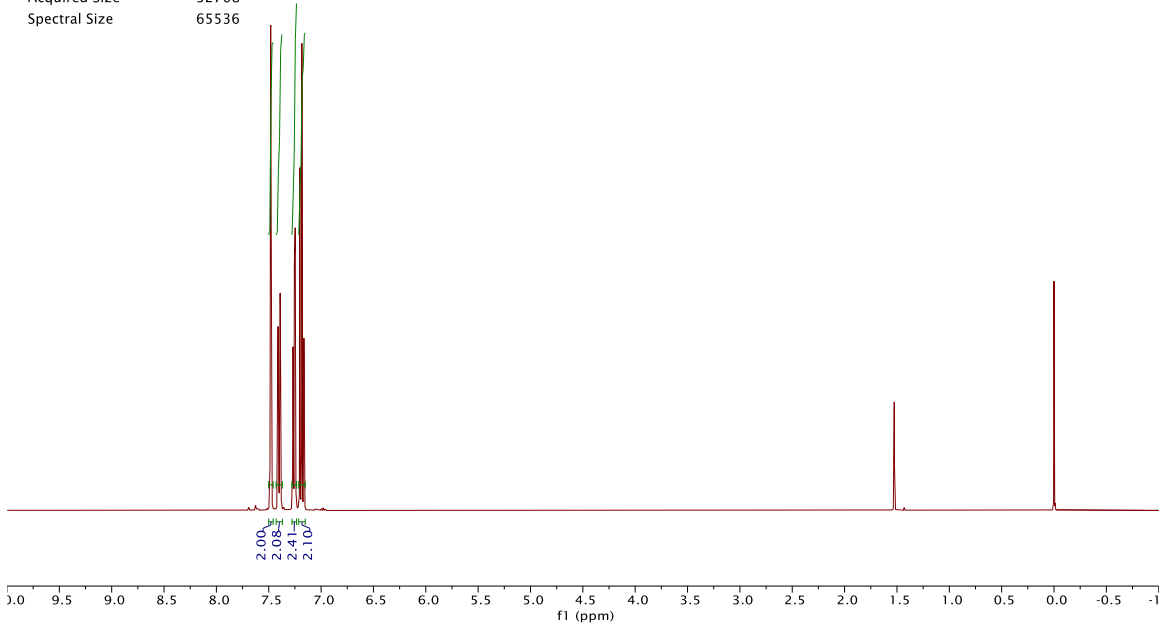

Origin Bruker BioSpin GmbH  
Solvent CDCl3  
Temperature 300.0  
Pulse Sequence zgpg30  
Experiment 1D  
Number of Scans 2048  
Acquisition Date 2018-03-19T21:05:00  
Spectrometer Frequency 100.62  
Spectral Width 24038.5  
Lowest Frequency -1944.7  
Nucleus 13C  
Acquired Size 32768  
Spectral Size 65536

137.34  
133.75  
130.79  
130.75  
129.81  
123.28

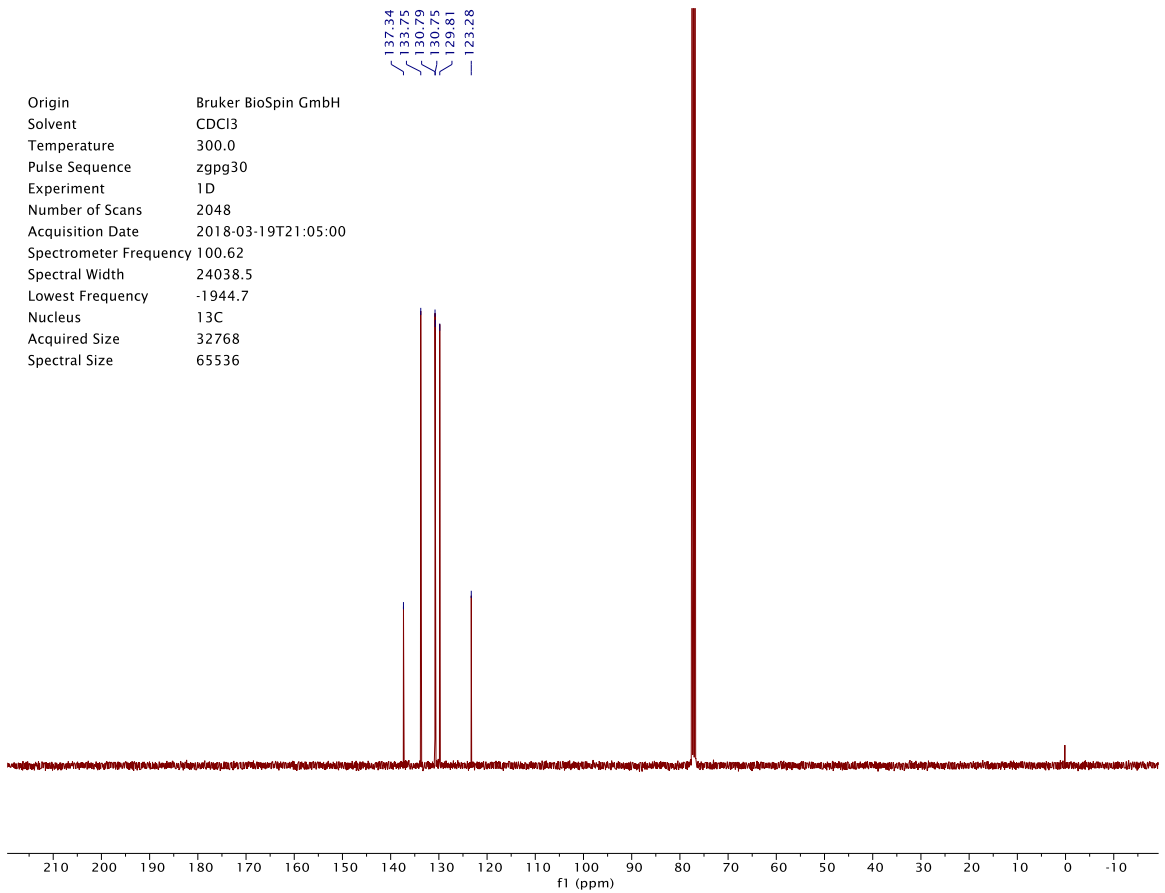

Origin Bruker BioSpin GmbH  
Solvent CDCl3  
Temperature 300.0  
Pulse Sequence zg30  
Experiment 1D  
Number of Scans 16  
Acquisition Date 2017-08-30T09:56:00  
Spectrometer Frequency 400.13  
Spectral Width 8012.8  
Lowest Frequency -1547.1  
Nucleus 1H  
Acquired Size 32768  
Spectral Size 65536

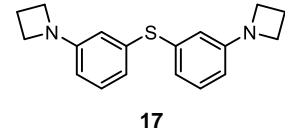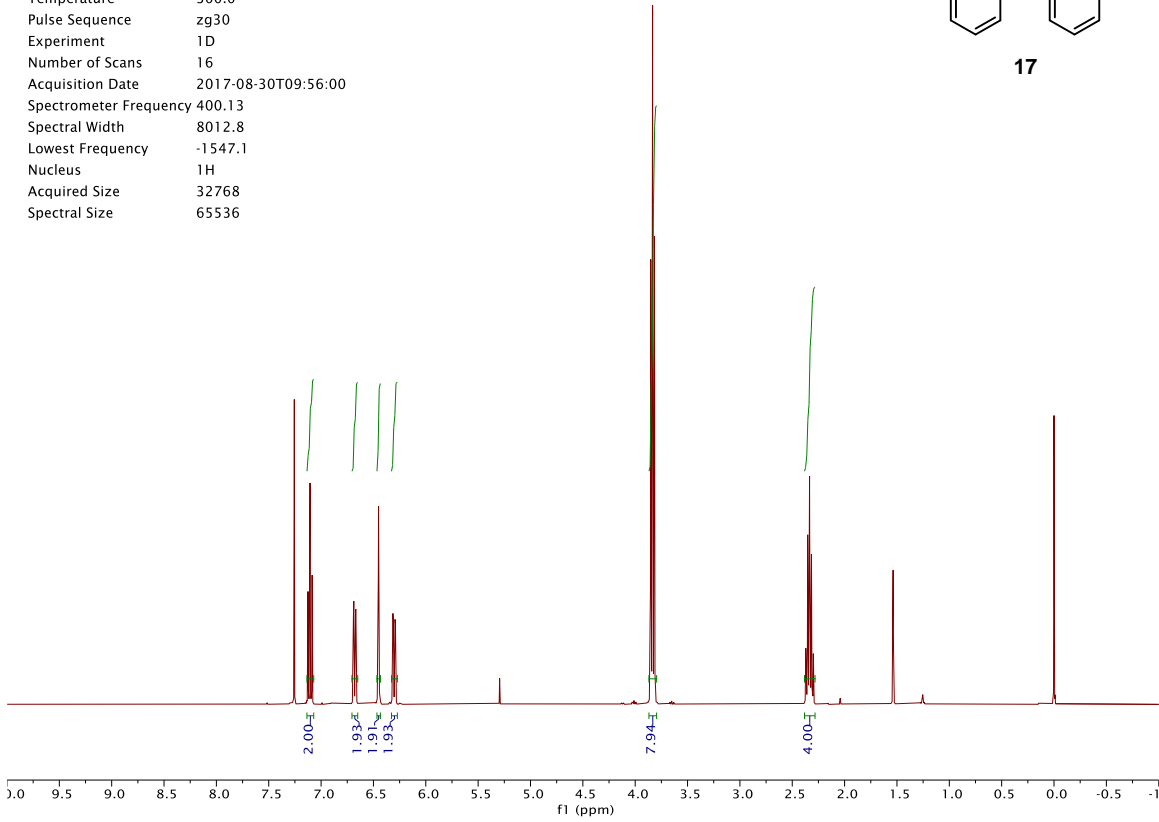

Origin Bruker BioSpin GmbH  
Solvent CDCl3  
Temperature 300.0  
Pulse Sequence zgpg30  
Experiment 1D  
Number of Scans 512  
Acquisition Date 2018-03-19T22:17:00  
Spectrometer Frequency 100.62  
Spectral Width 24038.5  
Lowest Frequency -1947.3  
Nucleus 13C  
Acquired Size 32768  
Spectral Size 65536

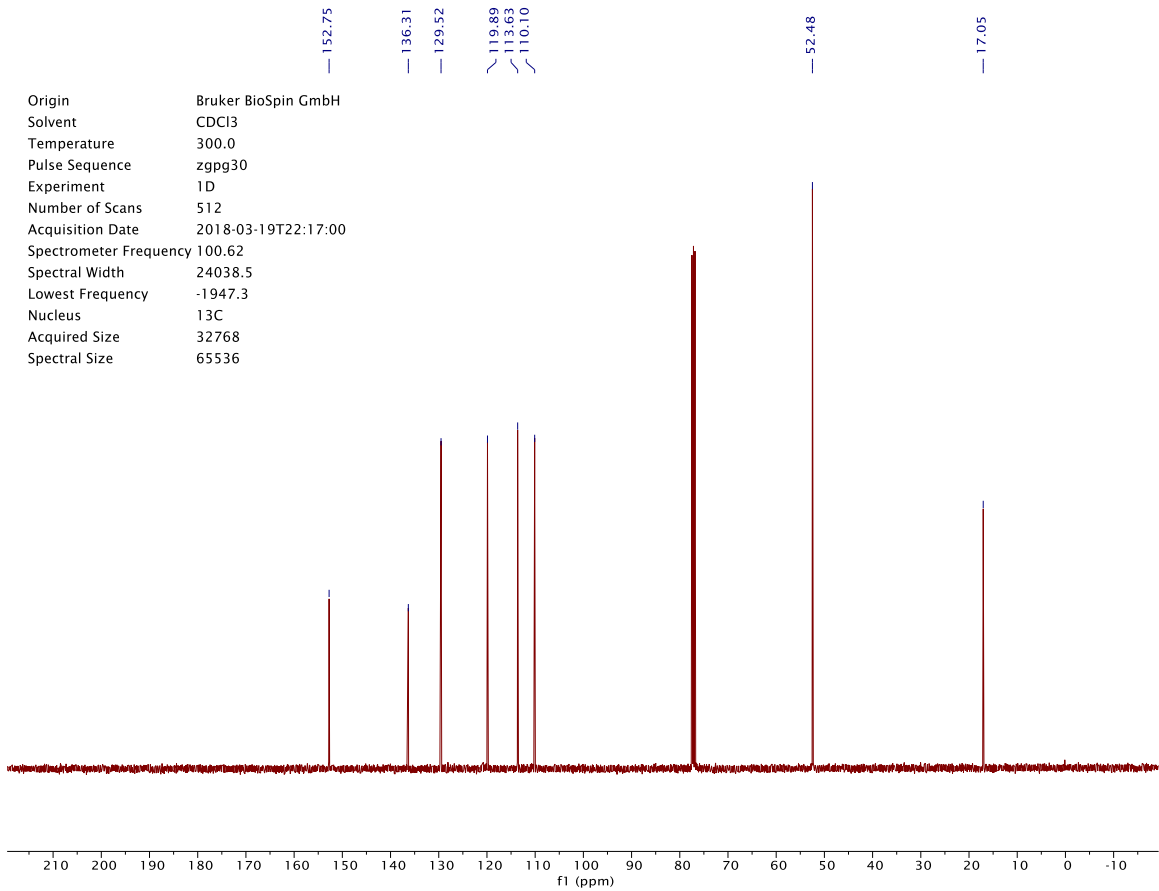

Origin Bruker BioSpin GmbH  
 Solvent CDCl3  
 Temperature 300.0  
 Pulse Sequence zg30  
 Experiment 1D  
 Number of Scans 16  
 Acquisition Date 2017-08-31T15:09:00  
 Spectrometer Frequency 400.13  
 Spectral Width 8012.8  
 Lowest Frequency -1546.2  
 Nucleus 1H  
 Acquired Size 32768  
 Spectral Size 65536

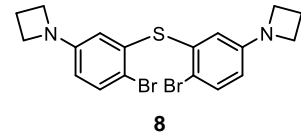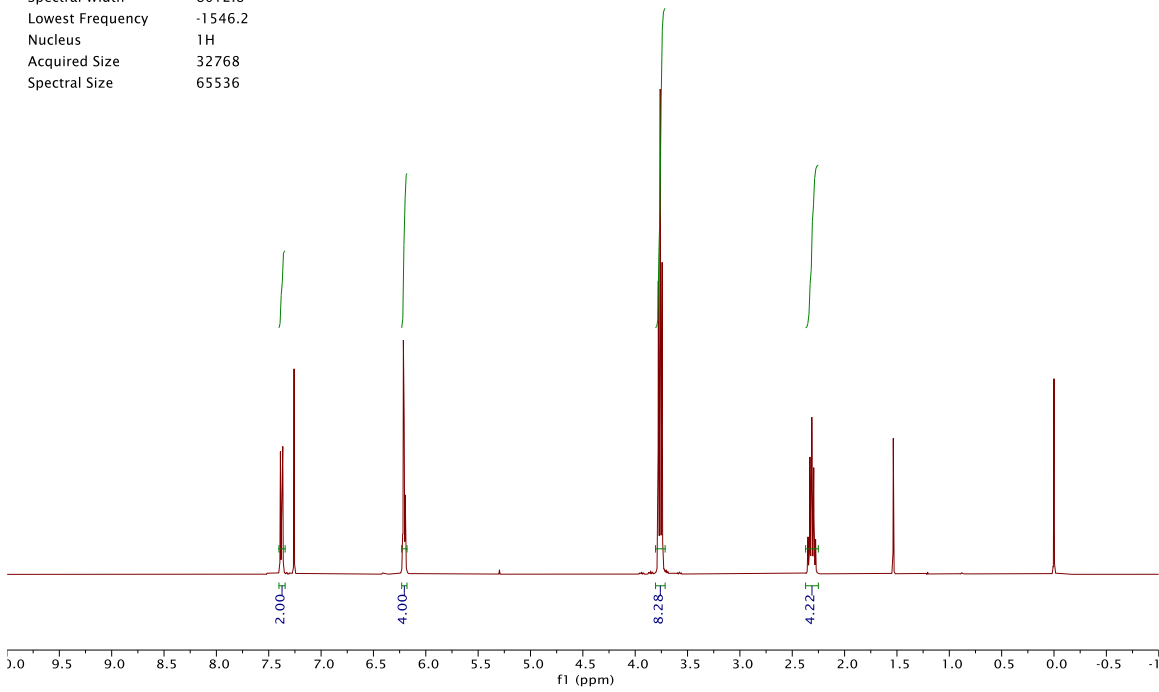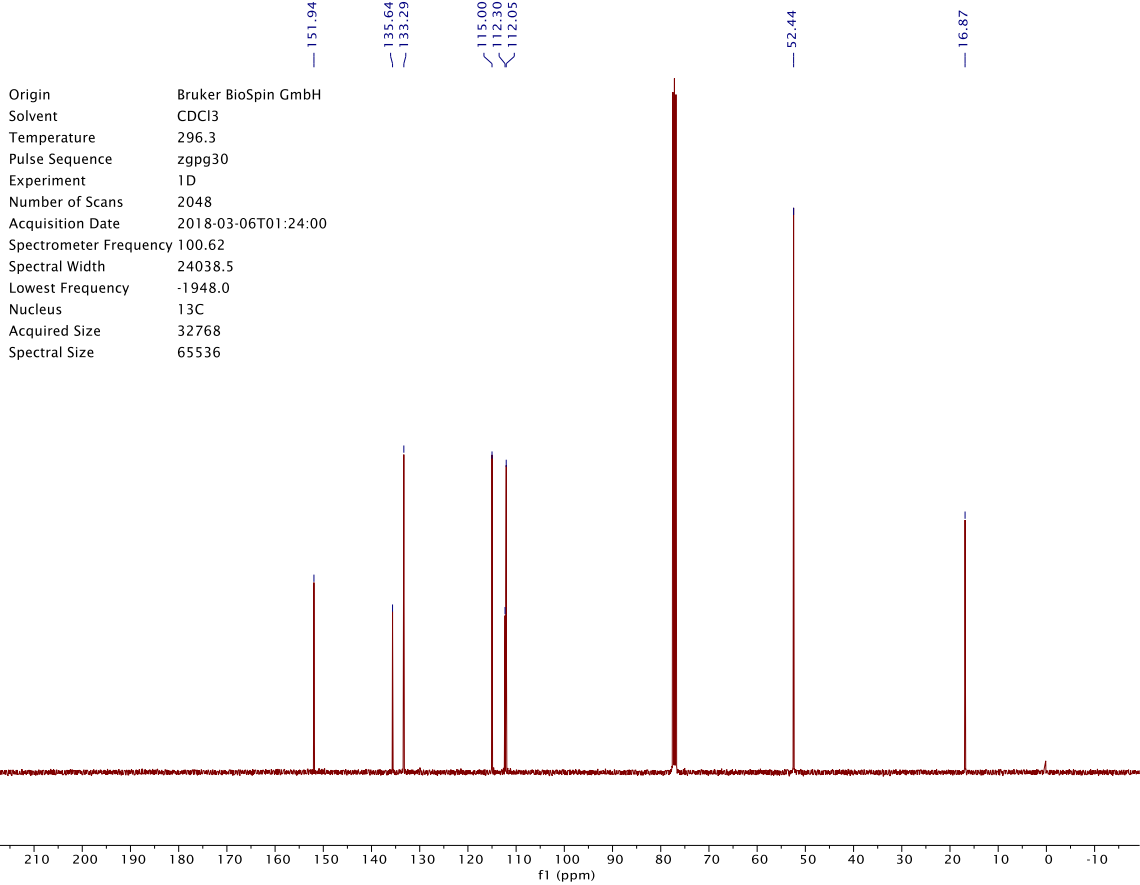

Origin Bruker BioSpin GmbH  
 Solvent CDCl3  
 Temperature 296.3  
 Pulse Sequence zgpg30  
 Experiment 1D  
 Number of Scans 2048  
 Acquisition Date 2018-03-06T01:24:00  
 Spectrometer Frequency 100.62  
 Spectral Width 24038.5  
 Lowest Frequency -1948.0  
 Nucleus 13C  
 Acquired Size 32768  
 Spectral Size 65536

Origin Bruker BioSpin GmbH  
 Solvent MeOD  
 Temperature 295.6  
 Pulse Sequence zg30  
 Experiment 1D  
 Number of Scans 16  
 Acquisition Date 2017-08-04T11:43:00  
 Spectrometer Frequency 400.13  
 Spectral Width 8012.8  
 Lowest Frequency -1543.4  
 Nucleus <sup>1</sup>H  
 Acquired Size 32768  
 Spectral Size 65536

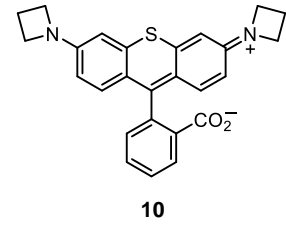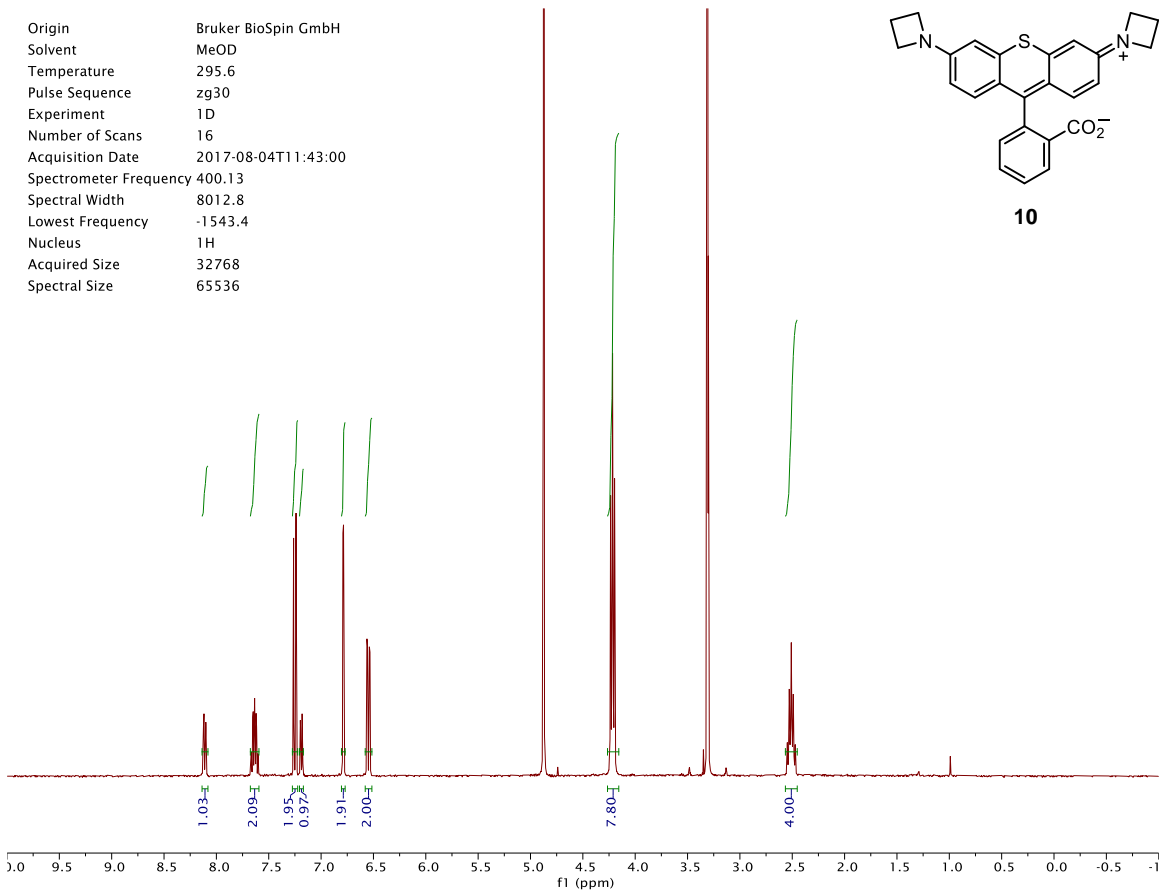

Origin Bruker BioSpin GmbH  
 Solvent MeOD  
 Temperature 296.3  
 Pulse Sequence zgpg30  
 Experiment 1D  
 Number of Scans 2048  
 Acquisition Date 2018-03-06T20:03:00  
 Spectrometer Frequency 100.62  
 Spectral Width 24038.5  
 Lowest Frequency -1818.8  
 Nucleus <sup>13</sup>C  
 Acquired Size 32768  
 Spectral Size 65536

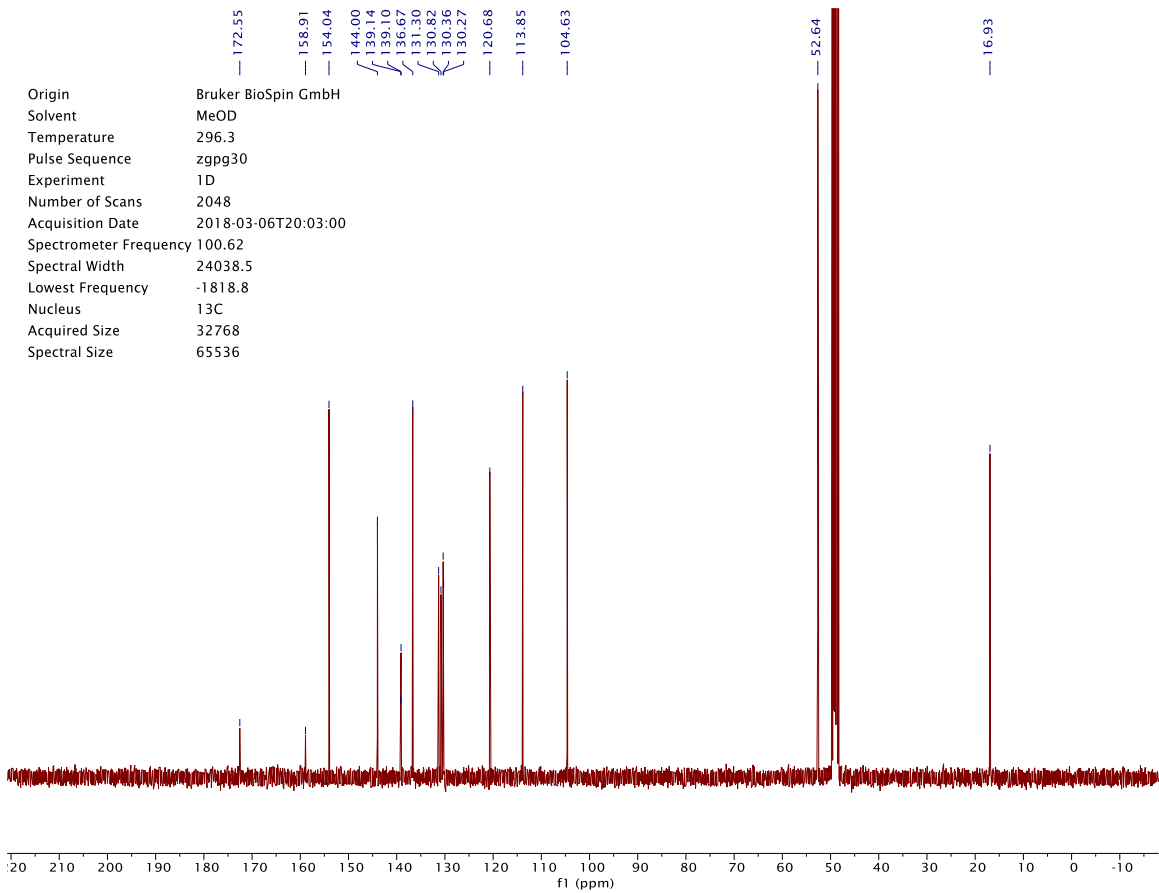



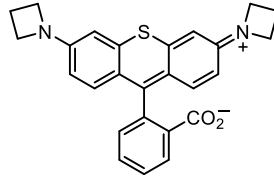

10

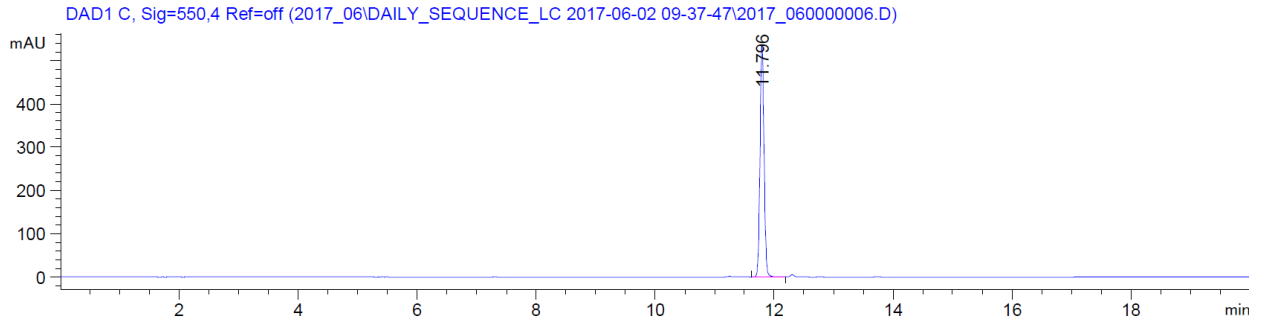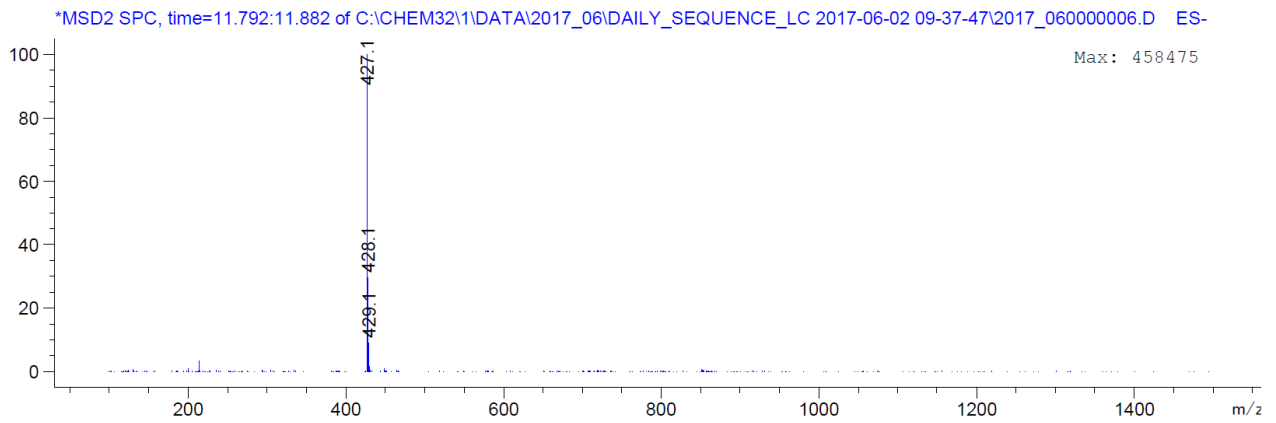

Origin Bruker BioSpin GmbH  
 Solvent MeOD  
 Temperature 300.0  
 Pulse Sequence zg30  
 Experiment 1D  
 Number of Scans 16  
 Acquisition Date 2018-05-29T11:22:00  
 Spectrometer Frequency 400.13  
 Spectral Width 8012.8  
 Lowest Frequency -1543.2  
 Nucleus <sup>1</sup>H  
 Acquired Size 32768  
 Spectral Size 65536

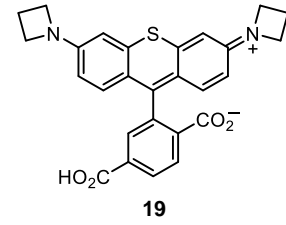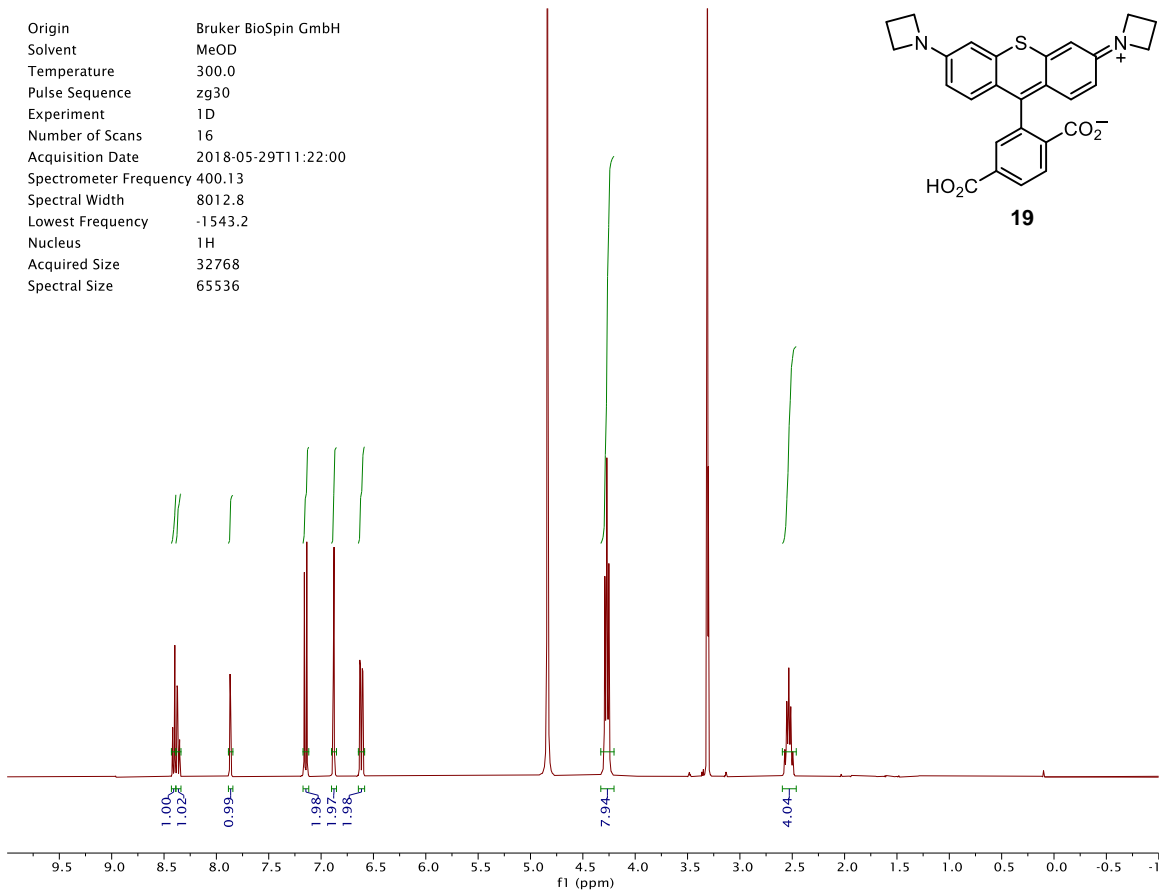

Origin Bruker BioSpin GmbH  
 Solvent MeOD  
 Temperature 300.0  
 Pulse Sequence zgpg30  
 Experiment 1D  
 Number of Scans 12000  
 Acquisition Date 2018-06-01T08:36:00  
 Spectrometer Frequency 100.62  
 Spectral Width 24038.5  
 Lowest Frequency -1817.2  
 Nucleus <sup>13</sup>C  
 Acquired Size 32768  
 Spectral Size 65536

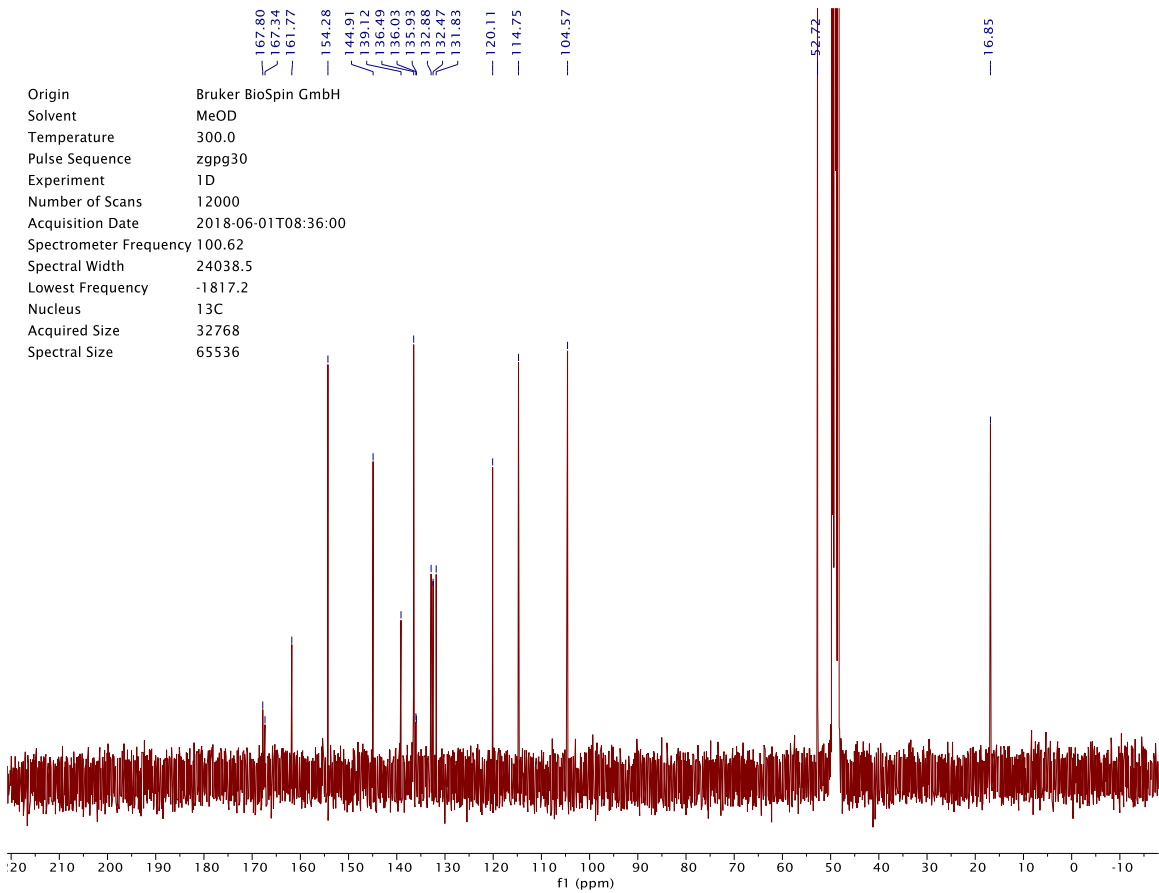

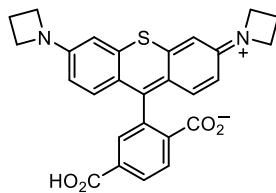

19

DAD1 C, Sig=575.4 Ref=off (2018\_05\DAI...\_SEQUENCE\_LC 2018-05-25 13-19-21\2018\_050000002.D)

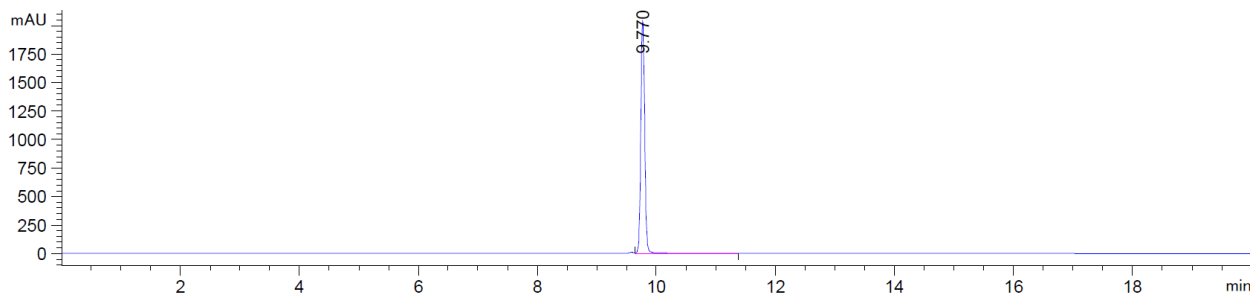

\*MSD2 SPC, time=9.771:9.862 of C:\CHEM32\1\DATA\2018\_05\DAI...\_SEQUENCE\_LC 2018-05-25 13-19-21\2018\_050000002.D ES-AP

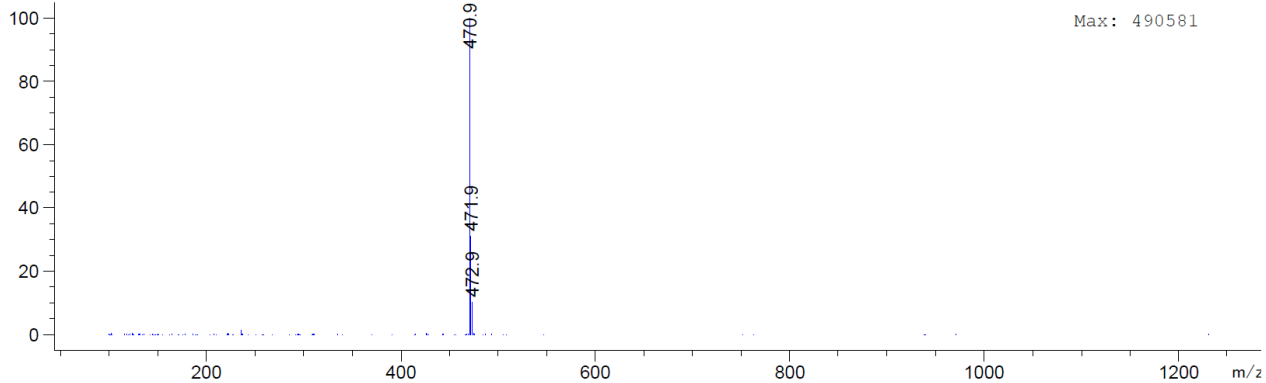

Origin Bruker BioSpin GmbH  
 Solvent MeOD  
 Temperature 300.0  
 Pulse Sequence zg30  
 Experiment 1D  
 Number of Scans 16  
 Acquisition Date 2017-11-30T10:56:00  
 Spectrometer Frequency 400.13  
 Spectral Width 8012.8  
 Lowest Frequency -1543.3  
 Nucleus <sup>1</sup>H  
 Acquired Size 32768  
 Spectral Size 65536

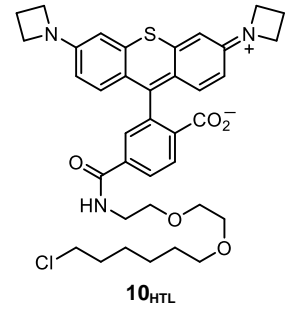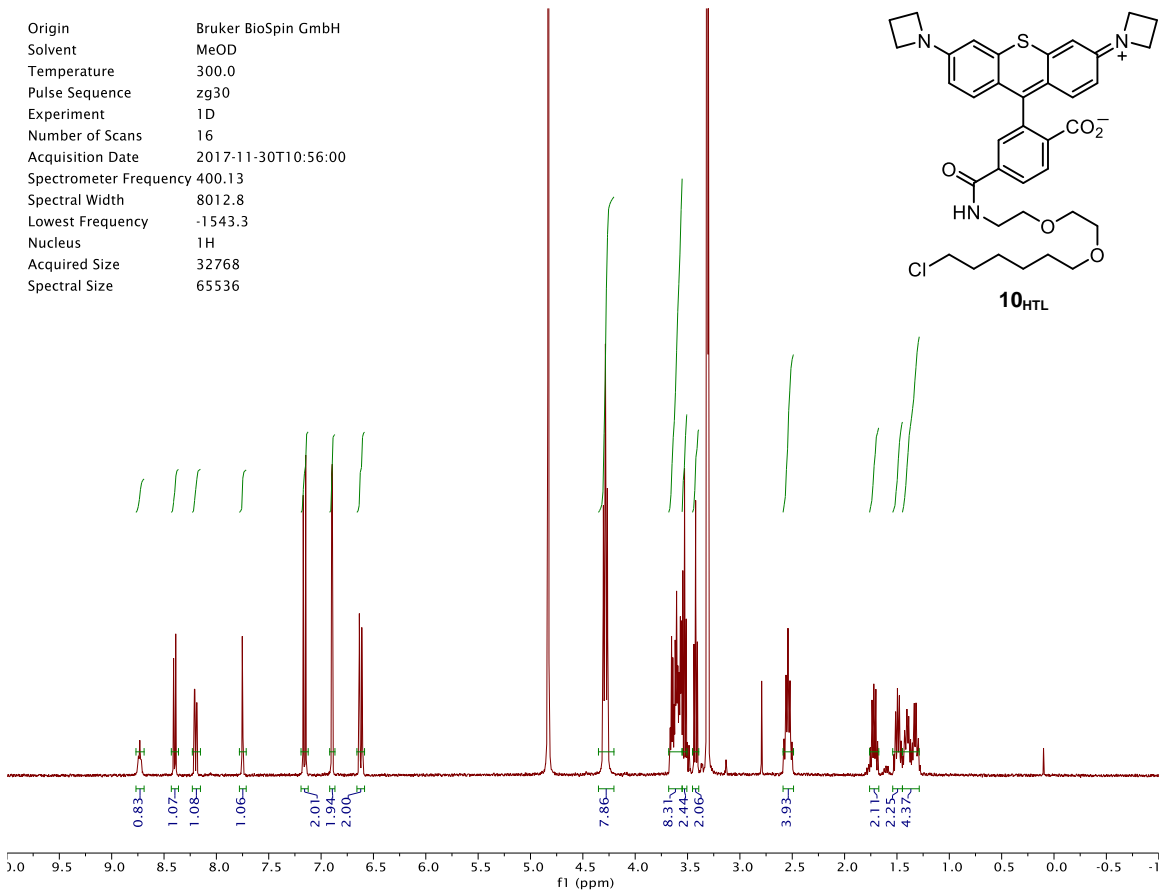

DAD1 C, Sig=575.4 Ref=off (2017\_11\DAIY\_SEQUENCE\_LC 2017-11-27 16-18-22\2017\_11000001.D)

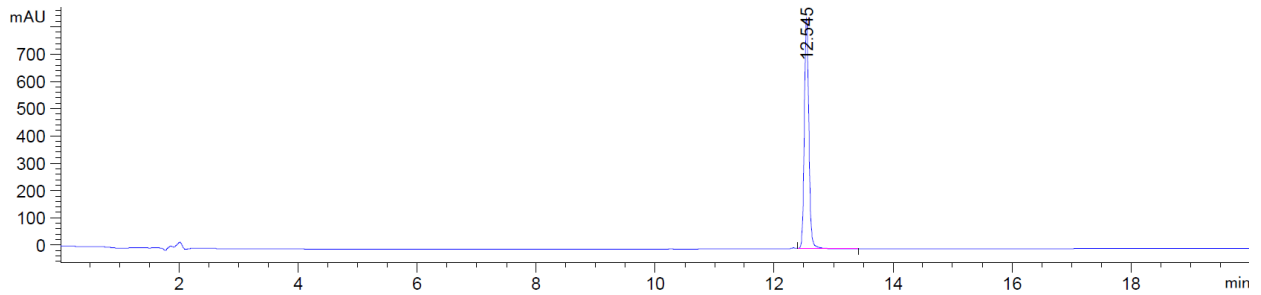

\*MSD2 SPC, time=12.646:12.736 of C:\CHEM321\DATA\2017\_11\DAIY\_SEQUENCE\_LC 2017-11-27 16-18-22\2017\_11000001.D ES-

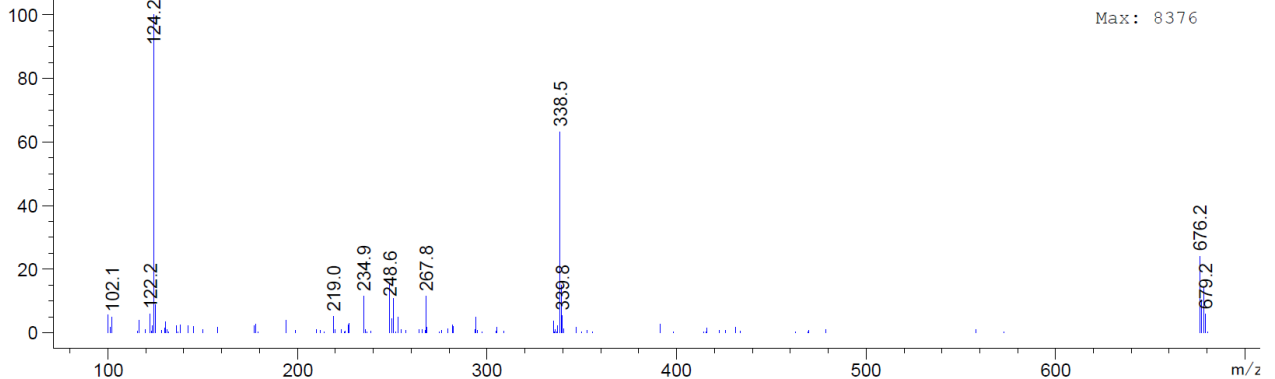

Supplement: NIHMS1610173-supplement-1.pdf [file NIHMS1610173-supplement-1.pdf]
