# Supplementary material
Source: PubMed Central journal article supplement (PMC7483975)
Supplement: NIHMS1610173-supplement-2.pdf [file NIHMS1610173-supplement-2.pdf]

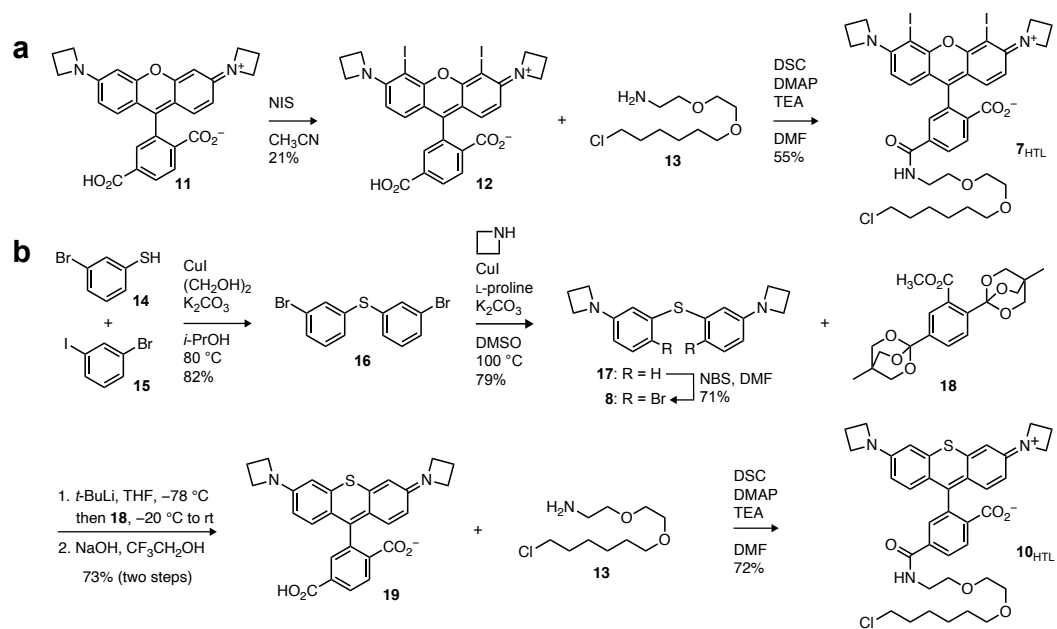

**Figure S1. Synthesis Schemes for Photosensitizer Janelia Fluor HaloTag Ligands, Related to Figure 2. (a) Synthesis of JF<sub>567</sub>-HaloTag ligand (**7<sub>HTL</sub>**). (b) Synthesis of JF<sub>570</sub>-HaloTag ligand (**10<sub>HTL</sub>**).**

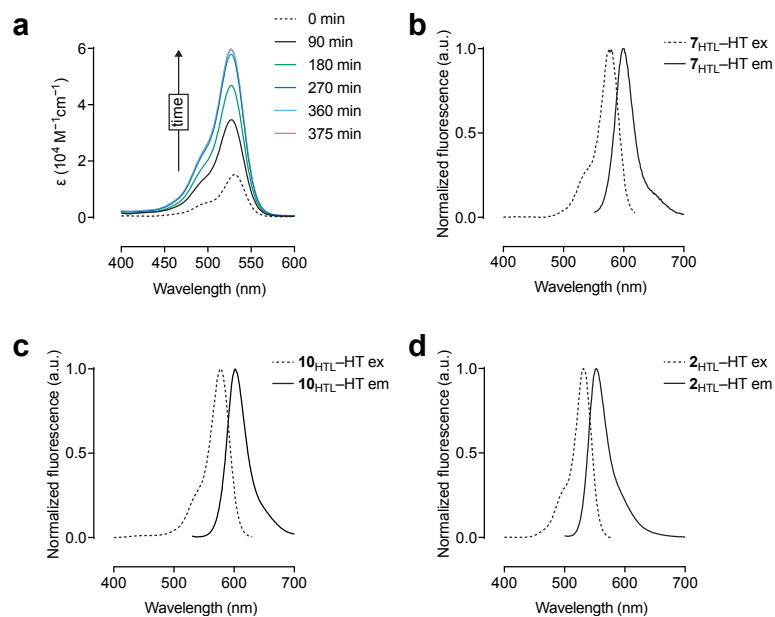

**Figure S2. Spectral Properties of Photosensitizer HaloTag Ligands, Related to Figure 2.** (a) Absorption spectra of  $2_{HTL}Ac_2$  incubated with PLE over time. (b–d) Normalized fluorescence excitation and emission spectra of JF<sub>567</sub>–HaloTag ligand ( $7_{HTL}$ ; b), JF<sub>570</sub>–HaloTag ligand ( $10_{HTL}$ ; c), and Eosin–HaloTag ligand ( $2_{HTL}$ ; d) bound to HaloTag protein.

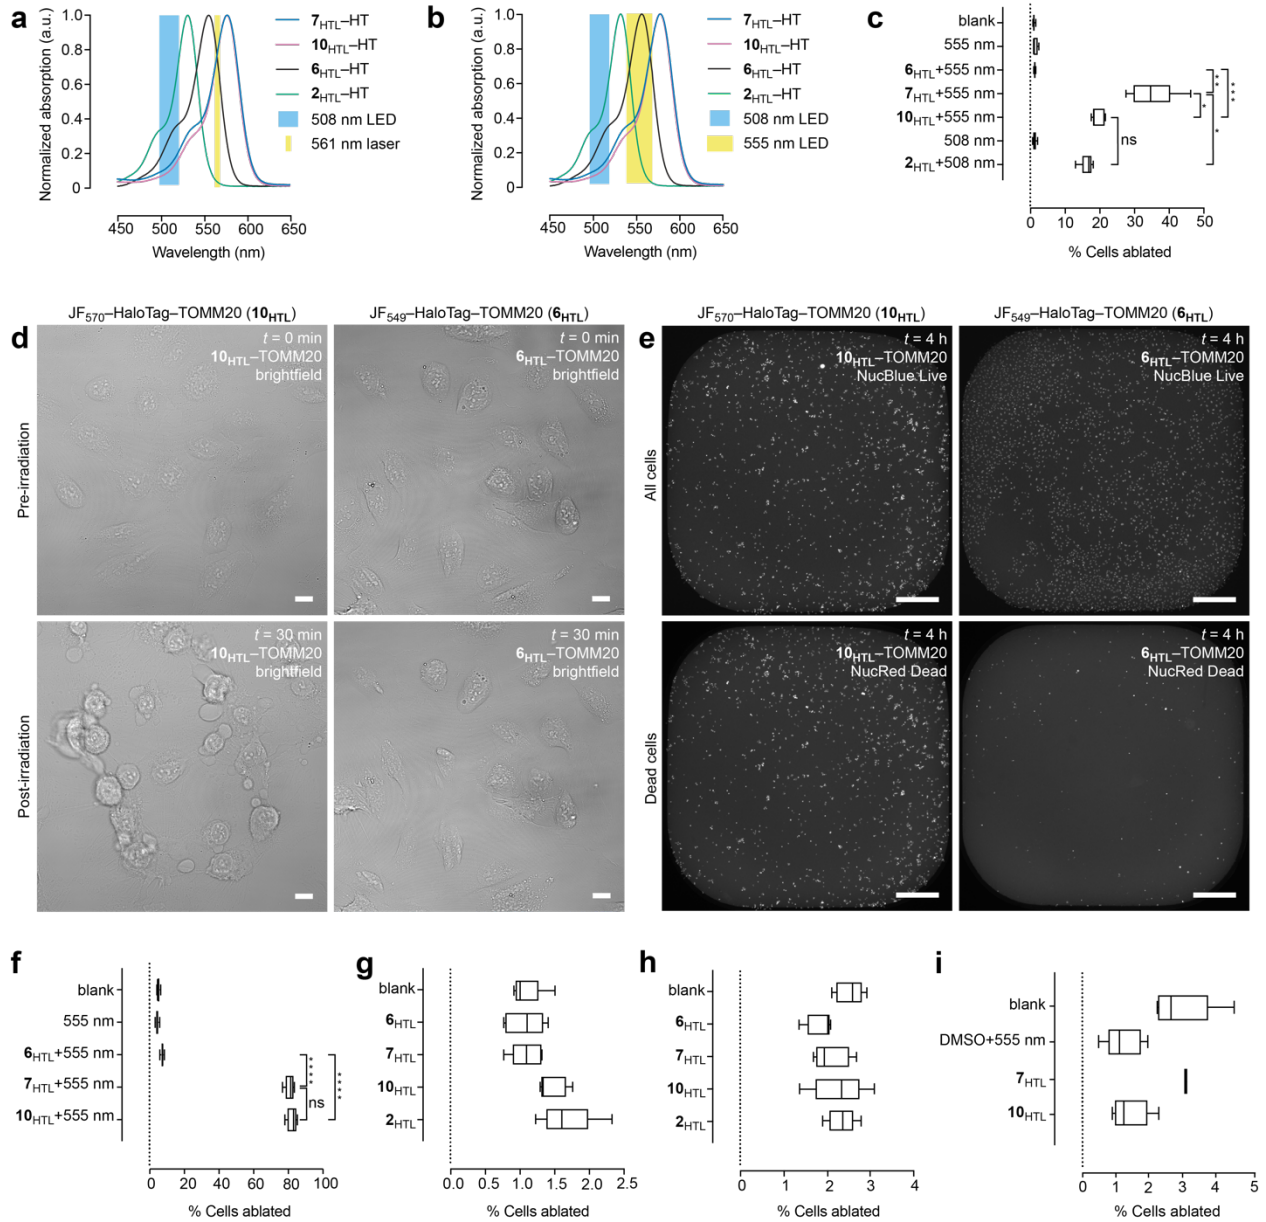

**Figure S3. Data for Cellular Experiments, Related to Figure 2.** (a) Normalized absorption spectra of  $2_{\text{HTL}}$ ,  $6_{\text{HTL}}$ ,  $7_{\text{HTL}}$ , and  $10_{\text{HTL}}$  overlaid with light sources used for CALI experiment. (b) Normalized absorption spectra of  $2_{\text{HTL}}$ ,  $6_{\text{HTL}}$ ,  $7_{\text{HTL}}$ , and  $10_{\text{HTL}}$  overlaid with light sources used for cell culture ablation experiment. (c) Comparison of cell-ablation efficacy using  $6_{\text{HTL}}$ ,  $7_{\text{HTL}}$ , and  $10_{\text{HTL}}$  with 555 nm excitation light or  $2_{\text{HTL}}$  using 508 nm excitation light in U2OS cells stably expressing HaloTag–H2B fusion protein exposed to 55 mW/cm<sup>2</sup> excitation light for 3 min. Data pooled from two experiments and analyzed via Welch’s ANOVA and Games–Howell post-hoc test ( $n = 10$  for no treatment control, otherwise  $n = 5$ , 10.89 mm<sup>2</sup> microplate wells). (d) Enlarged representative brightfield microscopy images showing U2OS cells expressing HaloTag–TOMM20 fusion protein incubated with  $10_{\text{HTL}}$  (left) or  $6_{\text{HTL}}$  (right) before ( $t = 0$  min; top) and after ( $t = 30$  min; bottom) widefield irradiation with 560 nm-centered light; scale bars: 13  $\mu\text{m}$ . (e) Representative data from cell-ablation experiment showing U2OS cells expressing HaloTag–TOMM20 fusion protein incubated with  $10_{\text{HTL}}$  (left) or  $6_{\text{HTL}}$  (right) after irradiation. Top panels show samples stained with NucBlue Live, which stains all cells and bottom panels show samples stained with NucRed Dead, which stains only dead cells; scale bars: 500  $\mu\text{m}$ . (f) Comparison of cell-ablation efficacy using  $6_{\text{HTL}}$ ,  $7_{\text{HTL}}$ , and  $10_{\text{HTL}}$  with 555 nm excitation light in U2OS cells stably expressing HaloTag–TOMM20 fusion protein exposed to 147 mW/cm<sup>2</sup> excitation light for 3 min,  $n = 5$ . (g–h) Control experiments comparing cell-ablation in the absence of light in cells expressing HaloTag–H2B (g) or HaloTag–TOMM20 (h);  $n = 5$ . (i) Control experiment comparing cell ablation in untransfected U2OS cells exposed to compounds or light;  $n = 5$  except for  $7_{\text{HTL}}$  experiment where  $n = 2$ . For plots c and f–i center line indicates median; box limits indicate upper and lower quartiles; whiskers indicate min–max; Data analyzed via ANOVA and Tukey’s HSD post-hoc test ( $n = 5$ , 10.89 mm<sup>2</sup> microplate wells); statistical significance in c and f reported as follows: \*  $p < 0.05$ , \*\*  $p < 0.01$ , \*\*\*  $p < 0.001$ , \*\*\*\*  $p < 0.0001$ .

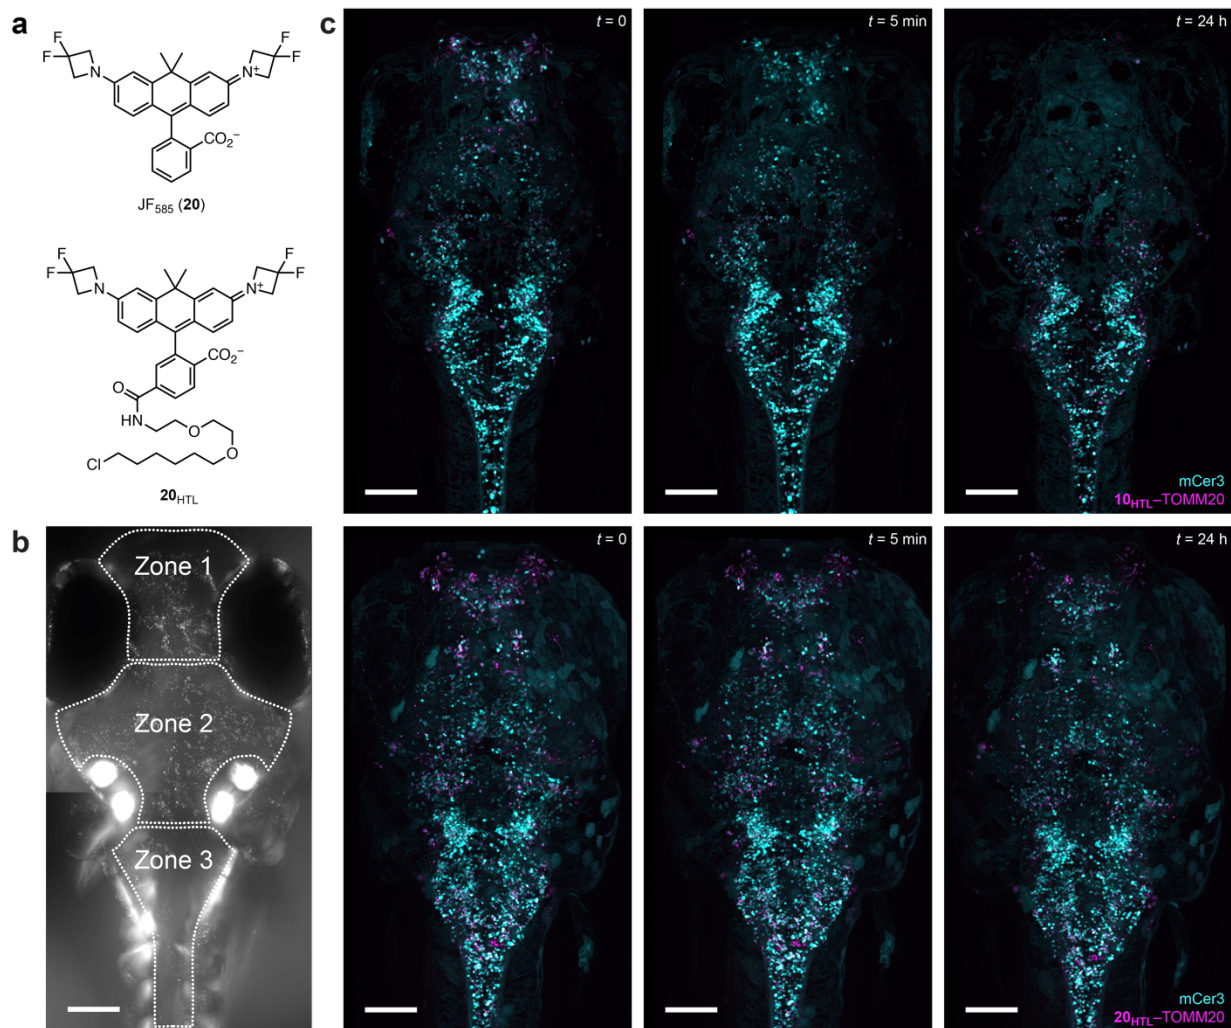

**Figure S4. Data for *in vivo* Experiments, Related to Figure 3.** (a). Chemical structures of JF<sub>585</sub> (**20**) and JF<sub>585</sub>-HaloTag ligand (**20**<sub>HTL</sub>). (b) Brightfield microscopy image (z-projection) indicating different zones of the zebrafish brain. (c) Enlarged representative fluorescence microscopy images from Figure 3c showing of zebrafish brains from animals expressing HaloTag-TOMM20 fusion proteins (magenta) and mCerulean (cyan) incubated with JF<sub>570</sub>-HaloTag ligand (**10**<sub>HTL</sub>, top) or **20**<sub>HTL</sub> (bottom) pre-irradiation (*t* = 0 min), immediately post-irradiation (*t* = 5 min), and 1 day post-irradiation (*t* = 24 h); scale bars for all images: 100  $\mu$ m.
